# Supplementary material for: The Effectiveness of a Community Nurse-Led Support Program for Dementia Caregivers in Chinese Communities: The Chongqing Ageing and Dementia Study
Source: PubMed Central journal article supplement — J Alzheimers Dis Rep. 2023 Nov 1;7(1):1153–64. doi: 10.3233/ADR-230067 (PMC10657713; doi:10.3233/adr-230067), 2023-11-01
Supplement: adr-7-adr230067-s001.pdf [file adr-7-adr230067-s001.pdf]

# Supplementary Material

## The Effectiveness of a Community Nurse-Led Support Program for Dementia Caregivers in Chinese Communities: The Chongqing Ageing and Dementia Study

**Supplementary Table 1.** Support needs of caregivers in the intervention group at baseline.

| <b>Demands</b>                                                                  | <b>Yes, n (%)</b> |
|---------------------------------------------------------------------------------|-------------------|
| <b>Information</b>                                                              |                   |
| Methods of hiring temporary caregivers                                          | 20 (71.4)         |
| Available support force                                                         | 23 (82.1)         |
| Get contact with who can provide nursing support services                       | 20 (71.4)         |
| Applicable subsidy                                                              | 10 (35.7)         |
| Advanced caregiving instruction                                                 | 9 (32.1)          |
| Assessment methods for the quality of care                                      | 11 (39.3)         |
| Knowledge of dementia                                                           | 21 (75.0)         |
| Available types of services                                                     | 10 (35.7)         |
| <b>Education and skills</b>                                                     |                   |
| Care of behavioral psychiatric symptoms of dementia                             | 25 (89.3)         |
| Ways to deal with stress and depression of caregiver                            | 28 (100)          |
| People-centered care                                                            | 13 (46.4)         |
| How to manage patients' activities of daily life                                | 12 (42.9)         |
| Drug management                                                                 | 9 (32.1)          |
| Wound care                                                                      | 2 (7.1)           |
| Transfer of patient                                                             | 5 (17.9)          |
| Care of urinary and fecal incontinence                                          | 8 (28.6)          |
| Prevention for pressure ulcer                                                   | 7 (25.0)          |
| Nutrition and water                                                             | 12 (42.9)         |
| Health care methods for people with dementia                                    | 17 (60.7)         |
| Others                                                                          | 1 (3.6)           |
| <b>Environmental security</b>                                                   |                   |
| Ways to prevent falls                                                           | 22 (78.6)         |
| Threats to health and safety                                                    | 14 (35.7)         |
| Food security                                                                   | 5 (64.3)          |
| Emergency care                                                                  | 22 (78.6)         |
| Traffic safety                                                                  | 10 (35.7)         |
| <b>Language, culture, and society</b>                                           |                   |
| Activities organized by social, cultural, and religious groups or organizations | 18 (64.3)         |
| Communication with other caregivers                                             | 22 (78.6)         |
| Appropriate social and cultural activities                                      | 18 (64.3)         |

---

|                                                                                          |           |
|------------------------------------------------------------------------------------------|-----------|
| Culturally and linguistically appropriate reading materials of care knowledge and skills | 12 (42.9) |
| Acquirement of local dialects when needed                                                | 2 (7.1)   |
| In contact with friends and family                                                       | 13 (46.4) |
| <b>Self-care methods</b>                                                                 |           |
| Exercise and relaxation                                                                  | 26 (92.9) |
| Relieving pressure                                                                       | 27 (96.4) |
| Priority care tasks to be completed                                                      | 19 (67.9) |
| Seeking help                                                                             | 19 (67.9) |
| Self-management of chronic diseases                                                      | 15 (53.6) |
| Available consultation                                                                   | 14 (50.0) |

---

**Supplementary Table 2.** Satisfaction degree of caregivers in intervention group after receiving nurse-led support.

| No. | Items                                                                                                  | Satisfied, n (%) |          | Unsatisfied, n (%) |      |
|-----|--------------------------------------------------------------------------------------------------------|------------------|----------|--------------------|------|
|     |                                                                                                        | Very             | Some     | Little             | None |
| 1   | Is it convenient to have access to the services provided by the medical staff in the community service | 30 (100)         |          | 0                  |      |
| 2   | Are you satisfied with the service mode of the medical staff in the community service                  | 30 (100)         |          | 0                  |      |
| 3   | Are you satisfied with the service level of the medical staff in the community service                 | 30 (100)         |          | 0                  |      |
| 4   | Are you satisfied with the service attitude of the medical staff in the community service              | 30 (100)         |          | 0                  |      |
| 5   | Are you satisfied with the explanation and communication of the medical staff in the community service | 30 (100)         |          | 0                  |      |
| 6   | Are you satisfied with the work of the community health service center                                 | 30 (100)         |          | 0                  |      |
| 7   | Is the medical staff providing community service helpful to you                                        | 24 (80.0)        | 6 (20.0) | 0                  | 0    |
